# Supplementary material for: Crystal structure, stability and Li superionic conductivity of pyrochlore-type solid electrolyte Li 2− x La (1+ x )/3 Nb 2 O 6 F: a first-principles calculation study
Source: Royal Society of Chemistry journal article supplement (doi:10.1039/d4ta04827j), 2024-01-01
Supplement: d4ta04827j1.pdf [file d4ta04827j1.pdf]

Supporting Information

**Crystal Structure, Stability and Li Superionic Conductivity of Pyrochlore-Type Solid Electrolyte  $\text{Li}_{2-x}\text{La}_{(1+x)/3}\text{Nb}_2\text{O}_6\text{F}$ : A First-Principles Calculation Study**

Randy Jalem,<sup>1,\*</sup> Kazunori Takada,<sup>1</sup> Hitoshi Onodera<sup>2</sup>, and Shuhei Yoshida<sup>2</sup>

<sup>1</sup>Center for Green Research on Energy and Environmental Materials (GREEN), National Institute for Materials Science (NIMS), 1-1 Namiki, Tsukuba, Ibaraki 305-0044, Japan

<sup>2</sup>Environment Neutral System Development Division, DENSO CORPORATION, 1 Yoshiike, Kusagi, Agui-cho, Chita-gun, Aichi 470-2298, Japan

Email: JALEM.Randy@nims.go.jp

### *Material synthesis*

The  $\text{Li}_{1.25}\text{La}_{0.58}\text{Nb}_2\text{O}_6\text{F}$  (LLNOF) solid electrolyte was prepared using the following synthesis conditions.  $\text{Li}_2\text{CO}_3$ ,  $\text{La}_2\text{O}_3$  and  $\text{Nb}_2\text{O}_5$  reactant powders in stoichiometric ratio were calcined at 773 K and then heated at 1473 K for 6 hours to synthesize the precursor  $\text{Li}_{0.5}\text{La}_{0.5}\text{Nb}_2\text{O}_6$ . Next, the synthesized  $\text{Li}_{0.5}\text{La}_{0.5}\text{Nb}_2\text{O}_6$  was mixed with  $\text{LaF}_3$  and  $\text{LiF}$ . Here, 91%-excess  $\text{LiF}$  was added. The mixture was then heated at 1273 K for 6 hours to synthesize the target LLNOF powder.

### *Cyclic voltammetry measurement*

The LLNOF electrolyte, acetylene black (AB) (conductive additive), and polyvinylidene fluoride (PVDF) (binder) were weighed in a mass ratio of 70:10:20 and then mixed with N-methyl-2-pyrrolidone (NMP) to form a paste. The paste was applied onto a copper foil and dried to make an electrode. The cyclic voltammetry evaluation was conducted using a 2032-type coin cell assembled with a Li anode. The electrolyte used was a solution of 1M  $\text{LiPF}_6$  dissolved in a mixture of ethylene carbonate (EC) and dimethyl carbonate (DEC) in a volume ratio of 1:1. The coin cells were assembled in an Ar atmosphere inside a glove box. Cyclic voltammetry measurements were performed using a potentiostat/galvanostat device, with a scan voltage range of 0.02 V to 3V and a scan rate of 10 mV/s at 25°C.

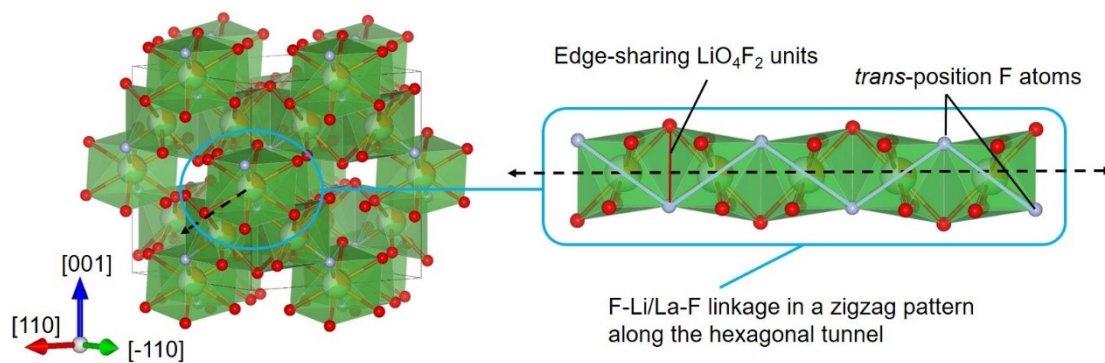

Figure S1. Visualization of the local structure of pyrochlore-type  $\text{Li}_{2-x}\text{La}_{(1+x)/3}\text{Nb}_2\text{O}_6\text{F}$  (LLNOF) showing the F-Li/La-F linkage in a zigzag pattern along the characteristic hexagonal tunnel. The octahedral  $\text{NbO}_6$  units are not displayed for clarity.

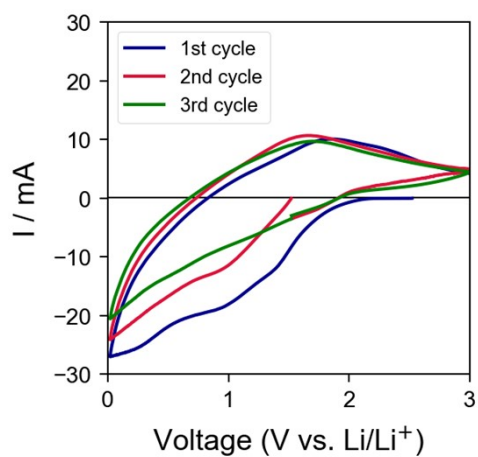

Figure S2. Cyclic voltammetry curves for the 1st, 2nd, and 3rd cycle of cell with LLNOF solid electrolyte.

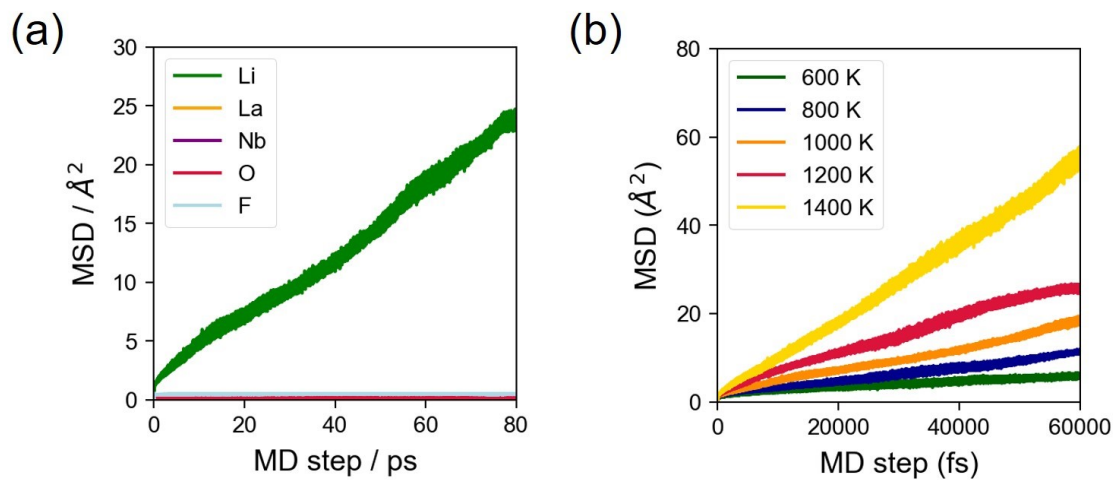

Figure S3. Mean squared displacement ( $MSD$ ) plots for (a) each atom types at 1000 K and (b) Li atoms in pyrochlore-type  $\text{Li}_{1.3125}\text{La}_{0.5625}\text{Nb}_2\text{O}_6\text{F}$  with the L1 structure (LLNOF-L1) from by NVT-AIMD calculations.

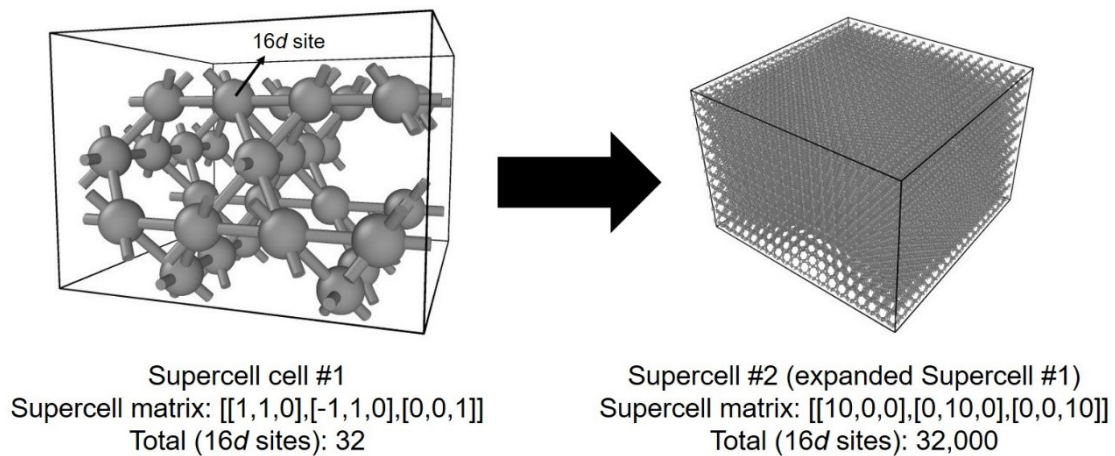

Figure S4. Supercell operation of the 16d-site cation sublattice in the  $\text{Li}_{2-x}\text{La}_{(1+x)/3}\text{Nb}_2\text{O}_6\text{F}$  crystal structure for use in the calculation of  $\text{Li}^+$  percolation threshold.

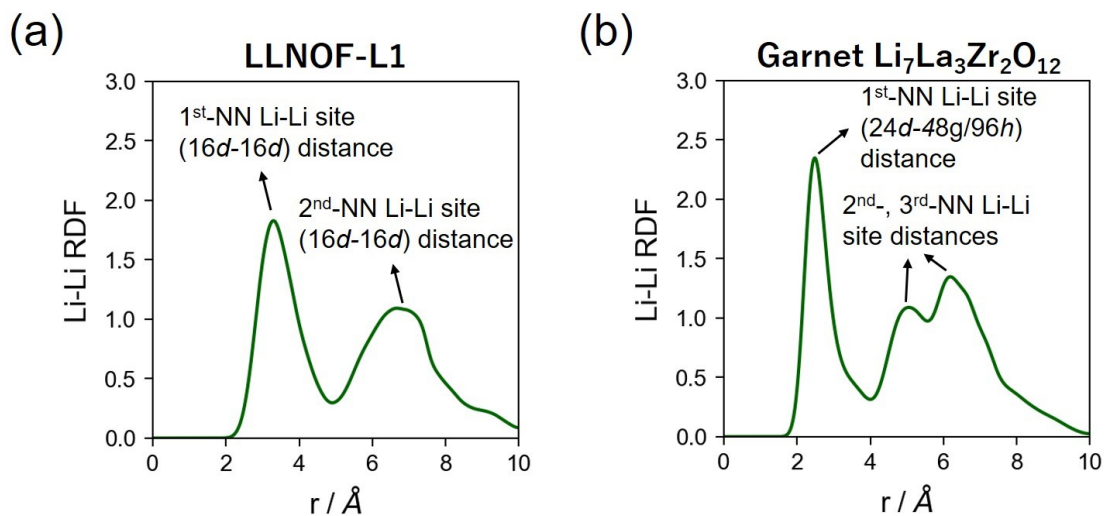

Figure S5. Li-Li radial distribution function (RDF) profiles derived from 1000-K NVT AIMD calculations for (a) pyrochlore-type  $\text{Li}_{1.3125}\text{La}_{0.5625}\text{Nb}_2\text{O}_6\text{F}$  with the L1 structure (LLNOF-L1) and (b) garnet-type cubic  $\text{Li}_7\text{La}_3\text{Zr}_2\text{O}_{12}$ .

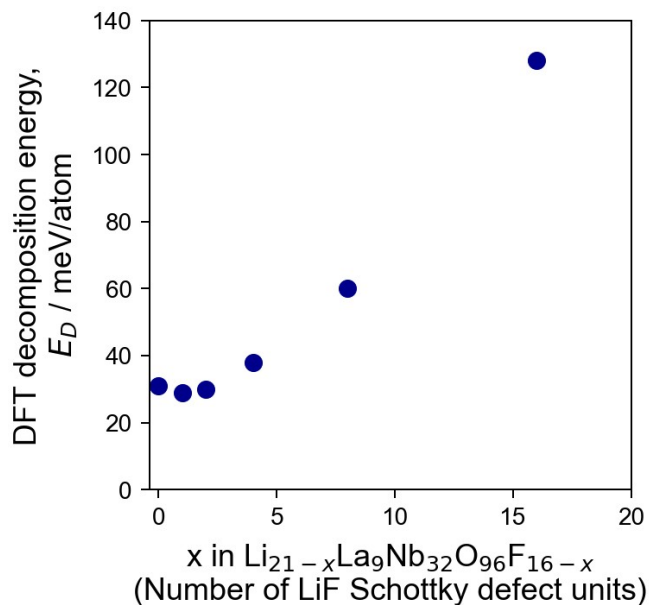

Figure S6. Plot for DFT decomposition energy as a function of the number of LiF Schottky defect units. The initial reference structure was based on  $\text{Li}_{1.3125}\text{La}_{0.5625}\text{Nb}_2\text{O}_6\text{F}$  composition (L1 structure, supercell formula is  $\text{Li}_{21}\text{La}_9\text{Nb}_{32}\text{O}_{96}\text{F}_{16}$  which is for  $x = 0$ ).

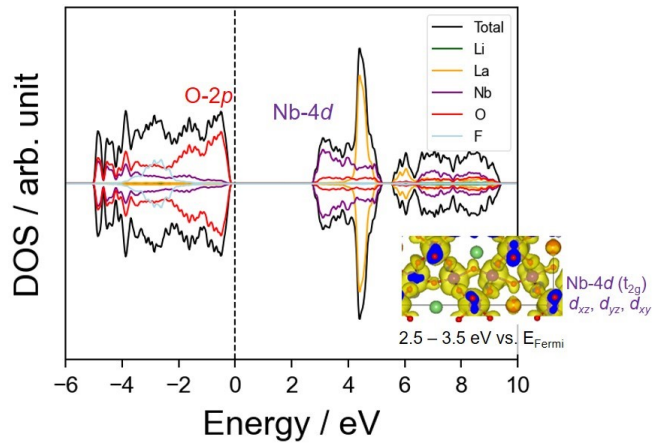

Figure S7. DFT-GGA electronic density of states (DOS) of pyrochlore-type  $\text{Li}_{1.3125}\text{La}_{0.5625}\text{Nb}_2\text{O}_6\text{F}$  (LLNOF-L1 structure). The Fermi energy is referenced as zero in the horizontal axis.

Table S1. Crystal structure coordinate data of LLNOF by XRD Rietveld analysis, as reported in Ref. 12. Space group:  $Fd\bar{3}m$  (cubic), lattice parameter  $a$ : 1.0445(1) nm, cell volume: 1.1396(1) nm<sup>3</sup>.

| Atom | Site | Occupancy (g) | Coordinates |       |       |
|------|------|---------------|-------------|-------|-------|
|      |      |               | x           | y     | z     |
| La   | 16d  | 0.2771(6)     | 1/2         | 1/2   | 1/2   |
| Li   | 16d  | 0.365(15)     | x(La)       | y(La) | z(La) |
| Nb   | 16c  | 1.0           | 0           | 0     | 0     |
| O    | 48f  | 1.0           | 0.3151(2)   | 1/8   | 1/8   |
| F    | 8b   | 0.989(8)      | 3/8         | 3/8   | 3/8   |

Table S2. Summary of DFT-predicted decomposition reactions related to the voltage stability window of pyrochlore-type  $\text{Li}_{1.3125}\text{La}_{0.5625}\text{Nb}_2\text{O}_6\text{F}$  with the L1 structure (LLNOF-L1).

| Voltage / V vs. Li/Li <sup>+</sup> | Decomposition reaction                                                                                                                                                                                       |
|------------------------------------|--------------------------------------------------------------------------------------------------------------------------------------------------------------------------------------------------------------|
| 0 – 0.54                           | $\text{Li}_{21}\text{La}_9\text{Nb}_{32}(\text{O}_6\text{F})_{16} + 160 \text{ Li} \rightarrow 4.5 \text{ La}_2\text{O}_3 + 16 \text{ LiF} + 82.5 \text{ Li}_2\text{O} + 32 \text{ Nb}$                      |
| 0.54 – 0.62                        | $\text{Li}_{21}\text{La}_9\text{Nb}_{32}(\text{O}_6\text{F})_{16} + 64 \text{ Li} \rightarrow 4.5 \text{ La}_2\text{O}_3 + 32 \text{ LiNbO}_2 + 16 \text{ LiF} + 18.5 \text{ Li}_2\text{O}$                  |
| 0.62 – 0.96                        | $\text{Li}_{21}\text{La}_9\text{Nb}_{32}(\text{O}_6\text{F})_{16} + 49.2 \text{ Li} \rightarrow 3.7 \text{ Li}_8\text{Nb}_2\text{O}_9 + 4.5 \text{ La}_2\text{O}_3 + 24.6 \text{ LiNbO}_2 + 16 \text{ LiF}$  |
| 0.96 – 0.99                        | $\text{Li}_{21}\text{La}_9\text{Nb}_{32}(\text{O}_6\text{F})_{16} + 45.5 \text{ Li} \rightarrow 4.5 \text{ La}_2\text{O}_3 + 22.75 \text{ LiNbO}_2 + 9.25 \text{ Li}_3\text{NbO}_4 + 16 \text{ LiF}$         |
| 0.99 – 1.33                        | $\text{Li}_{21}\text{La}_9\text{Nb}_{32}(\text{O}_6\text{F})_{16} + 41 \text{ Li} \rightarrow 20.5 \text{ LiNbO}_2 + 11.5 \text{ Li}_3\text{NbO}_4 + 7 \text{ LiF} + 9 \text{ LaOF}$                         |
| 1.33 – 1.74                        | $\text{Li}_{21}\text{La}_9\text{Nb}_{32}(\text{O}_6\text{F})_{16} + 32 \text{ Li} \rightarrow 16 \text{ LiNbO}_2 + 9 \text{ LaNbO}_4 + 7 \text{ Li}_3\text{NbO}_4 + 16 \text{ LiF}$                          |
| 1.74 – 1.92                        | $\text{Li}_{21}\text{La}_9\text{Nb}_{32}(\text{O}_6\text{F})_{16} + 18 \text{ Li} \rightarrow 14 \text{ LiNbO}_3 + 9 \text{ LiNbO}_2 + 9 \text{ LaNbO}_4 + 16 \text{ LiF}$                                   |
| 1.92 – 2.35                        | $\text{Li}_{21}\text{La}_9\text{Nb}_{32}(\text{O}_6\text{F})_{16} + 2.571 \text{ Li} \rightarrow 7.571 \text{ LiNbO}_3 + 1.286 \text{ Nb}_{12}\text{O}_{29} + 9 \text{ LaNbO}_4 + 16 \text{ LiF}$            |
| 2.35 – 2.49                        | $\text{Li}_{21}\text{La}_9\text{Nb}_{32}(\text{O}_6\text{F})_{16} + 0.8889 \text{ Li} \rightarrow 5.889 \text{ LiNb}_3\text{O}_8 + 0.4444 \text{ Nb}_{12}\text{O}_{29} + 9 \text{ LaNbO}_4 + 16 \text{ LiF}$ |
| 2.49 – 3.92                        | $\text{Li}_{21}\text{La}_9\text{Nb}_{32}(\text{O}_6\text{F})_{16} \rightarrow 5 \text{ LiNb}_3\text{O}_8 + 9 \text{ LaNbO}_4 + 4 \text{ Nb}_2\text{O}_5 + 16 \text{ LiF}$                                    |
| 3.92 – 3.93                        | $\text{Li}_{21}\text{La}_9\text{Nb}_{32}(\text{O}_6\text{F})_{16} \rightarrow 9 \text{ LaNbO}_4 + 11.5 \text{ Nb}_2\text{O}_5 + 16 \text{ LiF} + 1.25 \text{ O}_2 + 5 \text{ Li}$                            |
| 3.93 –                             | $\text{Li}_{21}\text{La}_9\text{Nb}_{32}(\text{O}_6\text{F})_{16} \rightarrow 3.667 \text{ LaNbO}_4 + 14.17 \text{ Nb}_2\text{O}_5 + 5.333 \text{ LaF}_3 + 5.25 \text{ O}_2 + 21 \text{ Li}$                 |

Table S3. Summary of DFT-predicted decomposition reactions related to the voltage stability window of  $\text{Li}_3\text{Nb}_3\text{O}_8$  which is one of the decomposition phases of pyrochlore-type  $\text{Li}_{1.3125}\text{La}_{0.5625}\text{Nb}_2\text{O}_6\text{F}$  with the L1 structure (LLNOF-L1).

| Voltage / V vs. Li/Li <sup>+</sup> | Decomposition reaction                                                                                                 |
|------------------------------------|------------------------------------------------------------------------------------------------------------------------|
| 0 – 0.54                           | $4 \text{ LiNb}_3\text{O}_8 + 60 \text{ Li} \rightarrow 32 \text{ Li}_2\text{O} + 12 \text{ Nb}$                       |
| 0.54 – 0.62                        | $4 \text{ LiNb}_3\text{O}_8 + 24 \text{ Li} \rightarrow 12 \text{ LiNbO}_2 + 8 \text{ Li}_2\text{O}$                   |
| 0.62 – 0.96                        | $4 \text{ LiNb}_3\text{O}_8 + 17.6 \text{ Li} \rightarrow 1.6 \text{ Li}_8\text{Nb}_2\text{O}_9 + 8.8 \text{ LiNbO}_2$ |
| 0.96 – 1.74                        | $4 \text{ LiNb}_3\text{O}_8 + 16 \text{ Li} \rightarrow 4 \text{ Li}_3\text{NbO}_4 + 8 \text{ LiNbO}_2$                |
| 1.74 – 1.92                        | $4 \text{ LiNb}_3\text{O}_8 + 8 \text{ Li} \rightarrow 8 \text{ LiNbO}_3 + 4 \text{ LiNbO}_2$                          |

|             |                                                                                                                     |
|-------------|---------------------------------------------------------------------------------------------------------------------|
| 1.92 – 2.35 | $4 \text{LiNb}_3\text{O}_8 + 1.143 \text{Li} \rightarrow 5.143 \text{LiNbO}_3 + 0.5714 \text{Nb}_{12}\text{O}_{29}$ |
| 2.35 – 3.92 | $4 \text{LiNb}_3\text{O}_8 \rightarrow 4 \text{LiNb}_3\text{O}_8$                                                   |
| 3.92 –      | $4 \text{LiNb}_3\text{O}_8 \rightarrow 6 \text{Nb}_2\text{O}_5 + \text{O}_2 + 4 \text{Li}$                          |

Table S4. Summary of DFT-predicted decomposition reactions related to the voltage stability window of LiF which is one of the decomposition phases of pyrochlore-type  $\text{Li}_{1.3125}\text{La}_{0.5625}\text{Nb}_2\text{O}_6\text{F}$  with the L1 structure (LLNOF-L1).

| Voltage / V vs. Li/Li <sup>+</sup> | Decomposition reaction                              |
|------------------------------------|-----------------------------------------------------|
| 0 – 6.36                           | $\text{LiF} \rightarrow \text{LiF}$                 |
| 6.36 –                             | $\text{LiF} \rightarrow 0.5 \text{F}_2 + \text{Li}$ |

Table S5. Summary of DFT-predicted decomposition reactions related to the voltage stability window of  $\text{LaNbO}_4$  which is one of the decomposition phases of pyrochlore-type  $\text{Li}_{1.3125}\text{La}_{0.5625}\text{Nb}_2\text{O}_6\text{F}$  with the L1 structure (LLNOF-L1).

| Voltage / V vs. Li/Li <sup>+</sup> | Decomposition reaction                                                                                                           |
|------------------------------------|----------------------------------------------------------------------------------------------------------------------------------|
| 0 – 0.54                           | $2 \text{LaNbO}_4 + 10 \text{Li} \rightarrow 5 \text{Li}_2\text{O} + \text{La}_2\text{O}_3 + 2 \text{Nb}$                        |
| 0.54 – 0.62                        | $2 \text{LaNbO}_4 + 4 \text{Li} \rightarrow 2 \text{LiNbO}_2 + \text{Li}_2\text{O} + \text{La}_2\text{O}_3$                      |
| 0.62 – 0.96                        | $2 \text{LaNbO}_4 + 3.2 \text{Li} \rightarrow 1.6 \text{LiNbO}_2 + 0.2 \text{Li}_8\text{Nb}_2\text{O}_9 + \text{La}_2\text{O}_3$ |
| 0.96 – 1.06                        | $2 \text{LaNbO}_4 + 3 \text{Li} \rightarrow 0.5 \text{Li}_3\text{NbO}_4 + 1.5 \text{LiNbO}_2 + \text{La}_2\text{O}_3$            |
| 1.06 – 1.30                        | $2 \text{LaNbO}_4 + 2 \text{Li} \rightarrow 0.3333 \text{Li}_3\text{NbO}_4 + 0.6667 \text{La}_3\text{NbO}_7 + \text{LiNbO}_2$    |
| 1.30 –                             | $2 \text{LaNbO}_4 \rightarrow 2 \text{LaNbO}_4$                                                                                  |

Table S6. Summary of DFT-predicted decomposition reactions related to the voltage stability window of  $\text{Nb}_2\text{O}_5$  which is one of the decomposition phases of pyrochlore-type  $\text{Li}_{1.3125}\text{La}_{0.5625}\text{Nb}_2\text{O}_6\text{F}$  with the L1 structure (LLNOF-L1).

| Voltage / V vs. Li/Li <sup>+</sup> | Decomposition reaction                                                                                             |
|------------------------------------|--------------------------------------------------------------------------------------------------------------------|
| 0 – 0.54                           | $14 \text{Nb}_2\text{O}_5 + 140 \text{Li} \rightarrow 70 \text{Li}_2\text{O} + 28 \text{Nb}$                       |
| 0.54 – 0.62                        | $14 \text{Nb}_2\text{O}_5 + 56 \text{Li} \rightarrow 28 \text{LiNbO}_2 + 14 \text{Li}_2\text{O}$                   |
| 0.62 – 0.96                        | $14 \text{Nb}_2\text{O}_5 + 44.8 \text{Li} \rightarrow 2.8 \text{Li}_8\text{Nb}_2\text{O}_9 + 22.4 \text{LiNbO}_2$ |
| 0.96 – 1.74                        | $14 \text{Nb}_2\text{O}_5 + 42 \text{Li} \rightarrow 7 \text{Li}_3\text{NbO}_4 + 21 \text{LiNbO}_2$                |
| 1.74 – 1.92                        | $14 \text{Nb}_2\text{O}_5 + 28 \text{Li} \rightarrow 14 \text{LiNbO}_3 + 14 \text{LiNbO}_2$                        |
| 1.92 – 2.35                        | $14 \text{Nb}_2\text{O}_5 + 4 \text{Li} \rightarrow 4 \text{LiNbO}_3 + 2 \text{Nb}_{12}\text{O}_{29}$              |



|             |                                                                                                                                |
|-------------|--------------------------------------------------------------------------------------------------------------------------------|
| 2.35 – 2.49 | $14 \text{ Nb}_2\text{O}_5 + 3.111 \text{ Li} \rightarrow 3.111 \text{ LiNb}_3\text{O}_8 + 1.556 \text{ Nb}_{12}\text{O}_{29}$ |
| 2.49 –      | $14 \text{ Nb}_2\text{O}_5 \rightarrow 14 \text{ Nb}_2\text{O}_5$                                                              |

Table S7. Summary of DFT-predicted decomposition reactions related to the voltage stability window of garnet-type cubic  $\text{Li}_7\text{La}_3\text{Zr}_2\text{O}_{12}$ .

| Voltage / V vs. Li/Li <sup>+</sup> | Decomposition reaction                                                                                                                                                    |
|------------------------------------|---------------------------------------------------------------------------------------------------------------------------------------------------------------------------|
| 0 – 0.04                           | $4 \text{ Li}_7\text{La}_3\text{Zr}_2\text{O}_{12} + 28 \text{ Li} \rightarrow 2 \text{ Zr}_4\text{O} + 28 \text{ Li}_2\text{O} + 6 \text{ La}_2\text{O}_3$               |
| 0.04 – 0.05                        | $4 \text{ Li}_7\text{La}_3\text{Zr}_2\text{O}_{12} + 26.67 \text{ Li} \rightarrow 2.667 \text{ Zr}_3\text{O} + 27.33 \text{ Li}_2\text{O} + 6 \text{ La}_2\text{O}_3$     |
| 0.05 – 2.90                        | $4 \text{ Li}_7\text{La}_3\text{Zr}_2\text{O}_{12} \rightarrow 4 \text{ Li}_6\text{Zr}_2\text{O}_7 + 2 \text{ Li}_2\text{O} + 6 \text{ La}_2\text{O}_3$                   |
| 2.90 – 3.16                        | $4 \text{ Li}_7\text{La}_3\text{Zr}_2\text{O}_{12} \rightarrow 4 \text{ Li}_6\text{Zr}_2\text{O}_7 + \text{Li}_2\text{O}_2 + 6 \text{ La}_2\text{O}_3 + 2 \text{ Li}$     |
| 3.16 – 3.24                        | $4 \text{ Li}_7\text{La}_3\text{Zr}_2\text{O}_{12} \rightarrow 7 \text{ Li}_2\text{O}_2 + 4 \text{ La}_2\text{Zr}_2\text{O}_7 + 2 \text{ La}_2\text{O}_3 + 14 \text{ Li}$ |
| 3.24 – 3.72                        | $4 \text{ Li}_7\text{La}_3\text{Zr}_2\text{O}_{12} \rightarrow 1.75 \text{ LiO}_8 + 4 \text{ La}_2\text{Zr}_2\text{O}_7 + 2 \text{ La}_2\text{O}_3 + 26.25 \text{ Li}$    |
| 3.72 –                             | $4 \text{ Li}_7\text{La}_3\text{Zr}_2\text{O}_{12} \rightarrow 4 \text{ La}_2\text{Zr}_2\text{O}_7 + 2 \text{ La}_2\text{O}_3 + 7 \text{ O}_2 + 28 \text{ Li}$            |

Table S8. Summary of DFT-predicted decomposition reactions related to the voltage stability window of  $\text{Li}_6\text{Zr}_2\text{O}_7$  which is one of the decomposition phases of garnet-type  $\text{Li}_7\text{La}_3\text{Zr}_2\text{O}_{12}$  (LLZO).

| Voltage / V vs. Li/Li <sup>+</sup> | Decomposition reaction                                                                                                       |
|------------------------------------|------------------------------------------------------------------------------------------------------------------------------|
| 0 – 0.04                           | $2 \text{ Li}_6\text{Zr}_2\text{O}_7 + 14 \text{ Li} \rightarrow \text{Zr}_4\text{O} + 13 \text{ Li}_2\text{O}$              |
| 0.04 – 0.05                        | $2 \text{ Li}_6\text{Zr}_2\text{O}_7 + 13.33 \text{ Li} \rightarrow 1.333 \text{ Zr}_3\text{O} + 12.67 \text{ Li}_2\text{O}$ |
| 0.05 – 3.21                        | $2 \text{ Li}_6\text{Zr}_2\text{O}_7 \rightarrow 2 \text{ Li}_6\text{Zr}_2\text{O}_7$                                        |
| 3.21 – 3.24                        | $2 \text{ Li}_6\text{Zr}_2\text{O}_7 \rightarrow 4 \text{ Li}_2\text{ZrO}_3 + \text{Li}_2\text{O}_2 + 2 \text{ Li}$          |
| 3.24 – 3.39                        | $2 \text{ Li}_6\text{Zr}_2\text{O}_7 \rightarrow 4 \text{ Li}_2\text{ZrO}_3 + 0.25 \text{ LiO}_8 + 3.75 \text{ Li}$          |
| 3.39 – 3.72                        | $2 \text{ Li}_6\text{Zr}_2\text{O}_7 \rightarrow 0.75 \text{ LiO}_8 + 4 \text{ ZrO}_2 + 11.25 \text{ Li}$                    |
| 3.72 –                             | $2 \text{ Li}_6\text{Zr}_2\text{O}_7 \rightarrow 4 \text{ ZrO}_2 + 3 \text{ O}_2 + 12 \text{ Li}$                            |

Table S9. Summary of DFT-predicted decomposition reactions related to the voltage stability window of  $\text{Li}_2\text{O}$  which is one of the reductive decomposition phases of garnet-type  $\text{Li}_7\text{La}_3\text{Zr}_2\text{O}_{12}$  (LLZO).

| Voltage / V vs. Li/Li <sup>+</sup> | Decomposition reaction                                                   |
|------------------------------------|--------------------------------------------------------------------------|
| 0 – 2.90                           | $\text{Li}_2\text{O} \rightarrow \text{Li}_2\text{O}$                    |
| 2.90 – 3.24                        | $\text{Li}_2\text{O} \rightarrow 0.5 \text{ Li}_2\text{O}_2 + \text{Li}$ |

|             |                                                                        |
|-------------|------------------------------------------------------------------------|
| 3.24 – 3.72 | $\text{Li}_2\text{O} \rightarrow 0.125 \text{LiO}_8 + 1.875 \text{Li}$ |
| 3.72 –      | $\text{Li}_2\text{O} \rightarrow 0.5 \text{O}_2 + 2 \text{Li}$         |

Table S10. Summary of DFT-predicted decomposition reactions related to the voltage stability window of  $\text{La}_2\text{O}_3$  which is one of the reductive decomposition phases of garnet-type  $\text{Li}_7\text{La}_3\text{Zr}_2\text{O}_{12}$  (LLZO).

| Voltage / V vs. $\text{Li}/\text{Li}^+$ | Decomposition reaction                                    |
|-----------------------------------------|-----------------------------------------------------------|
| 0 –                                     | $\text{La}_2\text{O}_3 \rightarrow \text{La}_2\text{O}_3$ |

Table S11. Summary of DFT-predicted decomposition reactions related to the voltage stability window of garnet-type  $\text{Li}_5\text{La}_3\text{Ta}_2\text{O}_{12}$  (LLTO).

| Voltage / V vs. $\text{Li}/\text{Li}^+$ | Decomposition reaction                                                                                                                                       |
|-----------------------------------------|--------------------------------------------------------------------------------------------------------------------------------------------------------------|
| 0 – 0.35                                | $4 \text{Li}_5\text{La}_3\text{Ta}_2\text{O}_{12} + 40 \text{Li} \rightarrow 30 \text{Li}_2\text{O} + 6 \text{La}_2\text{O}_3 + 8 \text{Ta}$                 |
| 0.35 – 0.55                             | $4 \text{Li}_5\text{La}_3\text{Ta}_2\text{O}_{12} + 10 \text{Li} \rightarrow 6 \text{Li}_5\text{TaO}_5 + 6 \text{La}_2\text{O}_3 + 2 \text{Ta}$              |
| 0.55 – 0.65                             | $4 \text{Li}_5\text{La}_3\text{Ta}_2\text{O}_{12} + 2.5 \text{Li} \rightarrow 7.5 \text{Li}_3\text{TaO}_4 + 6 \text{La}_2\text{O}_3 + 0.5 \text{Ta}$         |
| 0.65 – 3.23                             | $4 \text{Li}_5\text{La}_3\text{Ta}_2\text{O}_{12} \rightarrow 6.667 \text{Li}_3\text{TaO}_4 + 1.333 \text{La}_3\text{TaO}_7 + 4 \text{La}_2\text{O}_3$       |
| 3.23 – 3.24                             | $4 \text{Li}_5\text{La}_3\text{Ta}_2\text{O}_{12} \rightarrow 4 \text{La}_3\text{TaO}_7 + 2 \text{Li}_2\text{O}_2 + 4 \text{Li}_3\text{TaO}_4 + 4 \text{Li}$ |
| 3.24 – 3.47                             | $4 \text{Li}_5\text{La}_3\text{Ta}_2\text{O}_{12} \rightarrow 0.5 \text{LiO}_8 + 4 \text{La}_3\text{TaO}_7 + 4 \text{Li}_3\text{TaO}_4 + 7.5 \text{Li}$      |
| 3.47 – 3.72                             | $4 \text{Li}_5\text{La}_3\text{Ta}_2\text{O}_{12} \rightarrow 1.25 \text{LiO}_8 + 2 \text{La}_3\text{TaO}_7 + 6 \text{LaTaO}_4 + 18.75 \text{Li}$            |
| 3.72 –                                  | $4 \text{Li}_5\text{La}_3\text{Ta}_2\text{O}_{12} \rightarrow 2 \text{La}_3\text{TaO}_7 + 6 \text{LaTaO}_4 + 5 \text{O}_2 + 20 \text{Li}$                    |

Table S12. Summary of DFT-predicted decomposition reactions related to the voltage stability window of  $\text{Li}_3\text{TaO}_4$  which is one of the reductive decomposition phases of garnet-type  $\text{Li}_5\text{La}_3\text{Ta}_2\text{O}_{12}$  (LLTO).

| Voltage / V vs. $\text{Li}/\text{Li}^+$ | Decomposition reaction                                                                        |
|-----------------------------------------|-----------------------------------------------------------------------------------------------|
| 0 – 0.35                                | $\text{Li}_3\text{TaO}_4 + 5 \text{Li} \rightarrow 4 \text{Li}_2\text{O} + \text{Ta}$         |
| 0.35 – 0.55                             | $\text{Li}_3\text{TaO}_4 + \text{Li} \rightarrow 0.8 \text{Li}_5\text{TaO}_5 + 0.2 \text{Ta}$ |
| 0.55 – 3.59                             | $\text{Li}_3\text{TaO}_4 \rightarrow \text{Li}_3\text{TaO}_4$                                 |
| 3.59 – 3.72                             | $\text{Li}_3\text{TaO}_4 \rightarrow \text{LiTaO}_3 + 0.125 \text{LiO}_8 + 1.875 \text{Li}$   |

|             |                                                                                                            |
|-------------|------------------------------------------------------------------------------------------------------------|
| 3.72 – 3.94 | $\text{Li}_3\text{TaO}_4 \rightarrow \text{LiTaO}_3 + 0.5 \text{O}_2 + 2 \text{Li}$                        |
| 3.94 – 4.03 | $\text{Li}_3\text{TaO}_4 \rightarrow 0.3333 \text{LiTa}_3\text{O}_8 + 0.6667 \text{O}_2 + 2.667 \text{Li}$ |
| 4.03 –      | $\text{Li}_3\text{TaO}_4 \rightarrow 0.5 \text{Ta}_2\text{O}_5 + 0.75 \text{O}_2 + 3 \text{Li}$            |

Table S13. Summary of DFT-predicted decomposition reactions related to the voltage stability window of  $\text{Li}_5\text{TaO}_5$  which is one of the reductive decomposition phases of  $\text{Li}_3\text{TaO}_4$ .

| Voltage / V vs. Li/Li <sup>+</sup> | Decomposition reaction                                                                                    |
|------------------------------------|-----------------------------------------------------------------------------------------------------------|
| 0 – 0.35                           | $\text{Li}_5\text{TaO}_5 + 5 \text{Li} \rightarrow 5 \text{Li}_2\text{O} + \text{Ta}$                     |
| 0.35 – 3.10                        | $\text{Li}_5\text{TaO}_5 \rightarrow \text{Li}_5\text{TaO}_5$                                             |
| 3.10 – 3.24                        | $\text{Li}_5\text{TaO}_5 \rightarrow 0.5 \text{Li}_2\text{O}_2 + \text{Li}_3\text{TaO}_4 + \text{Li}$     |
| 3.24 – 3.59                        | $\text{Li}_5\text{TaO}_5 \rightarrow \text{Li}_3\text{TaO}_4 + 0.125 \text{LiO}_8 + 1.875 \text{Li}$      |
| 3.59 – 3.72                        | $\text{Li}_5\text{TaO}_5 \rightarrow \text{LiTaO}_3 + 0.25 \text{LiO}_8 + 3.75 \text{Li}$                 |
| 3.72 – 3.94                        | $\text{Li}_5\text{TaO}_5 \rightarrow \text{LiTaO}_3 + \text{O}_2 + 4 \text{Li}$                           |
| 3.94 – 4.03                        | $\text{Li}_5\text{TaO}_5 \rightarrow 0.3333 \text{LiTa}_3\text{O}_8 + 1.167 \text{O}_2 + 4.667 \text{Li}$ |
| 4.03 –                             | $\text{Li}_5\text{TaO}_5 \rightarrow 0.5 \text{Ta}_2\text{O}_5 + 1.25 \text{O}_2 + 5 \text{Li}$           |

Table S14. Summary of DFT-predicted decomposition reactions related to the voltage stability window of  $\text{La}_3\text{TaO}_7$  which is one of the reductive decomposition phases of  $\text{Li}_3\text{TaO}_4$ .

| Voltage / V vs. Li/Li <sup>+</sup> | Decomposition reaction                                                                                                              |
|------------------------------------|-------------------------------------------------------------------------------------------------------------------------------------|
| 0 – 0.35                           | $\text{La}_3\text{TaO}_7 + 5 \text{Li} \rightarrow 2.5 \text{Li}_2\text{O} + 1.5 \text{La}_2\text{O}_3 + \text{Ta}$                 |
| 0.35 – 0.55                        | $\text{La}_3\text{TaO}_7 + 2.5 \text{Li} \rightarrow 0.5 \text{Li}_5\text{TaO}_5 + 1.5 \text{La}_2\text{O}_3 + 0.5 \text{Ta}$       |
| 0.55 – 0.65                        | $\text{La}_3\text{TaO}_7 + 1.875 \text{Li} \rightarrow 0.625 \text{Li}_3\text{TaO}_4 + 1.5 \text{La}_2\text{O}_3 + 0.375 \text{Ta}$ |
| 0.65 –                             | $\text{La}_3\text{TaO}_7 \rightarrow \text{La}_3\text{TaO}_7$                                                                       |
